# Supplementary material for: Antibacterial, Antibiofilm, and Antiviral Farnesol-Containing Nanoparticles Prevent Staphylococcus aureus from Drug Resistance Development
Source: MDPI journal article supplement (doi:10.3390/ijms23147527), 2022-07-07
Supplement: s1 [file s1]

# Antibacterial, Antibiofilm, and Antiviral Farnesol-Containing Nanoparticles Prevent *Staphylococcus aureus* from Drug Resistance Development

Aleksandra Ivanova <sup>1</sup>, Kristina Ivanova <sup>1</sup>, Luisa Fiandra <sup>2</sup>, Paride Mantecca <sup>2</sup>, Tiziano Catelani <sup>3</sup>, Michal Natan <sup>4</sup>, Ehud Banin <sup>4</sup>, Gila Jacobi <sup>4</sup>, and Tzanko Tzanov <sup>1,\*</sup>

- <sup>1</sup> Group of Molecular and Industrial Biotechnology, Chemical engineering, Universitat Politècnica de Catalunya, Terrassa, Spain; aleksandra.asenova@upc.edu (A.I.); kristina.ivanova@upc.edu (K.I.);  
<sup>2</sup> Department of Earth and Environmental Sciences, Research Center POLARIA, Università degli Studi di Milano-Bicocca, Milano, Italy; luisa.fiandra@unimib.it (L.F.); paride.mantecca@unimib.it (P.M.);  
<sup>3</sup> Interdepartmental Microscopy Platform, University of Milano – Bicocca, Milano, Italy; tiziano.catelani@unimib.it (T.C.);  
<sup>4</sup> The Institute for Advanced Materials and Nanotechnology, The Mina and Everard Goodman Faculty of Life Sciences, Bar-Ilan University, Ramat-Gan 52900, Israel; natan.michal@gmail.com (M.N.); Ehud.Banin@biu.ac.il (E.B.); gilajacobi@gmail.com (G.J.);  
\* Correspondence: tzanko.tzanov@upc.edu ;Tel.: (optional; include country code; if there are multiple corresponding authors, add author initials)

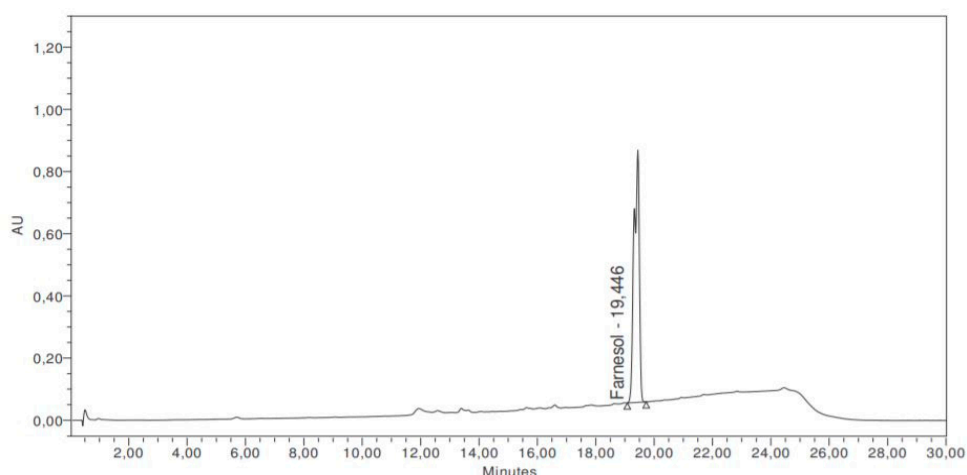

**Figure S1.** HPLC chromatogram of farnesol into FSL NPs.

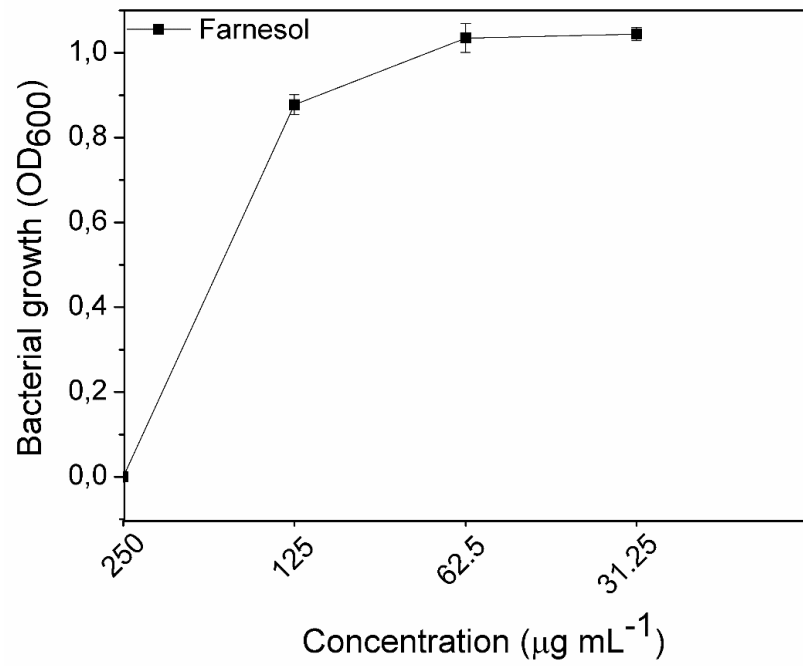

Figure S2. Antibacterial activity of farnesol bulk solution.

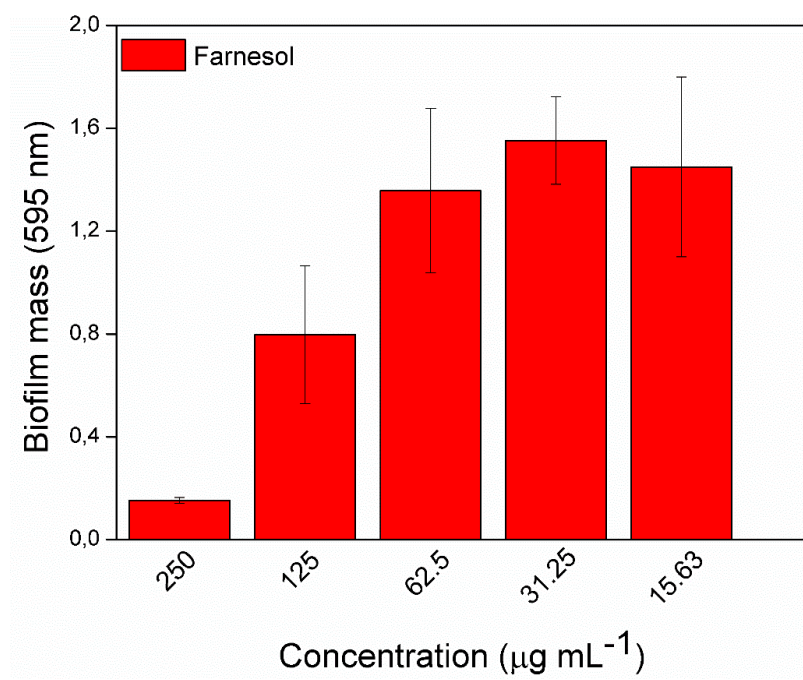

Figure S3. Biofilm inhibition properties of farnesol bulk solution.

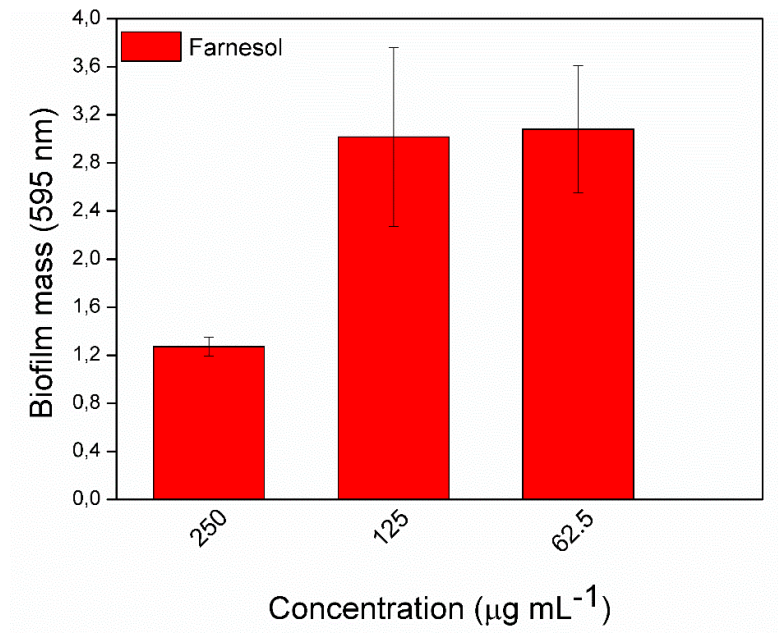

**Figure S4.** Biofilm eradication properties of farnesol bulk solution.
